# Supplementary material
Source: PubMed Central journal article supplement (PMC6738235)

**Adrenomedulin**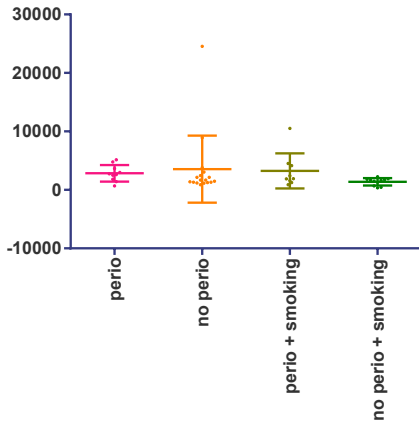**SLP1**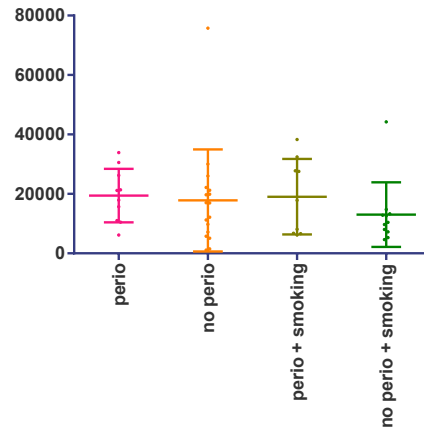**BPI**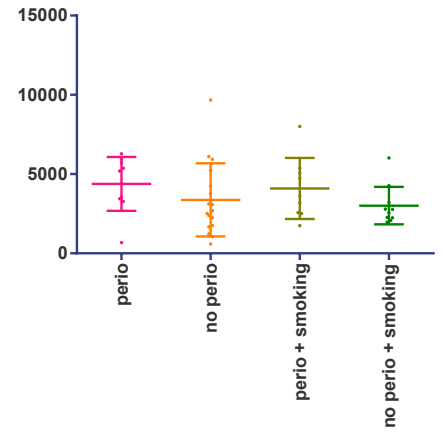**BPI CAP57**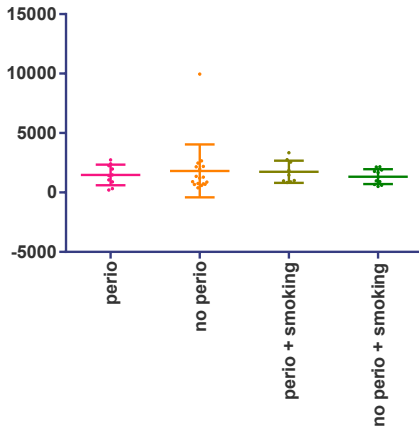**B2M**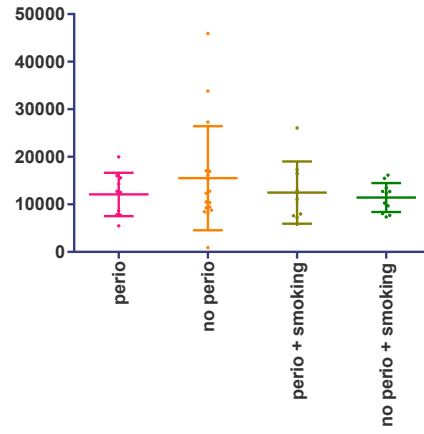**Beta-defensin 118**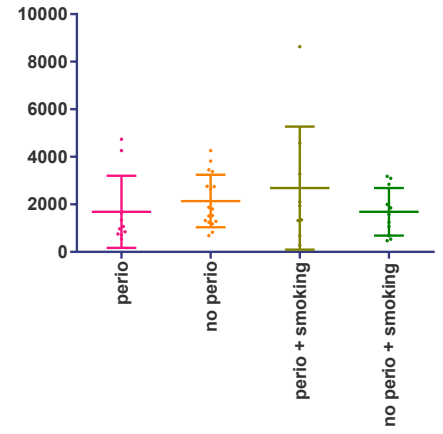**Beta-defensin 126**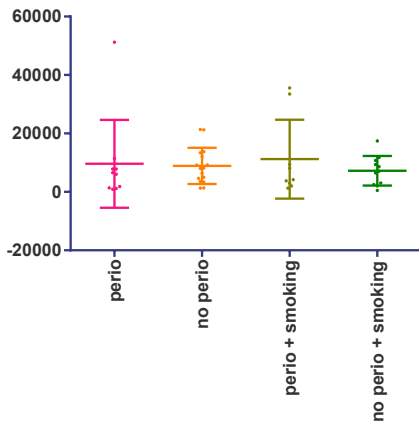**Beta-defensin 127**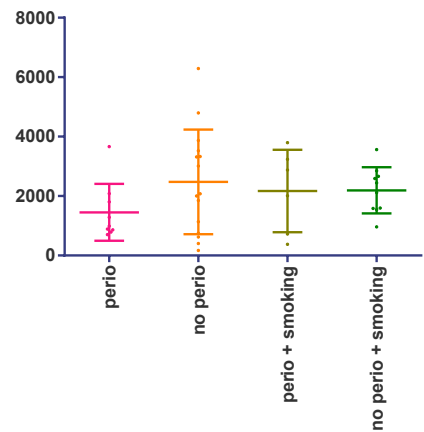**Beta-defensin 128**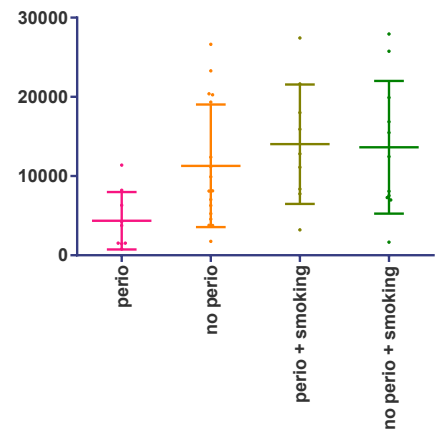

**Beta-defensin 131**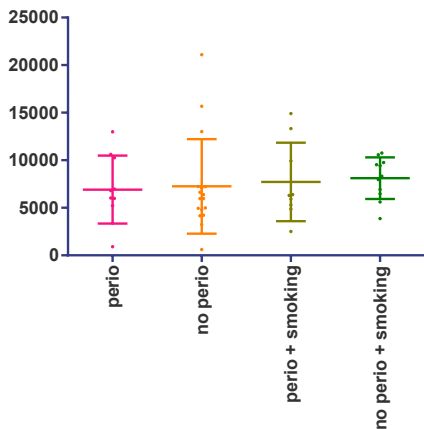**BMPG**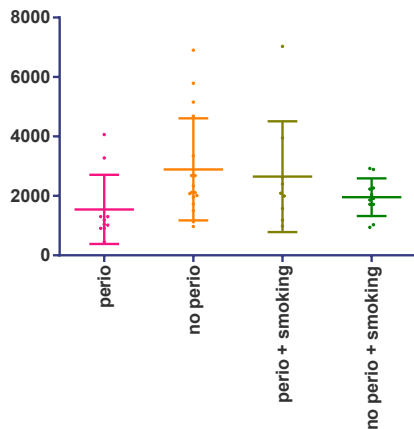**BPIFA1**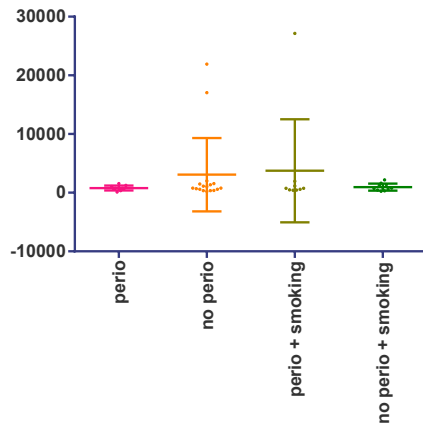**BPIFA2**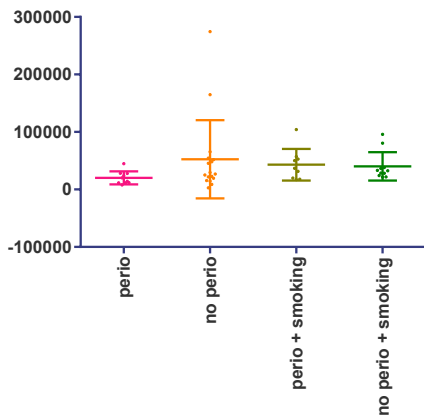**BPIFB1**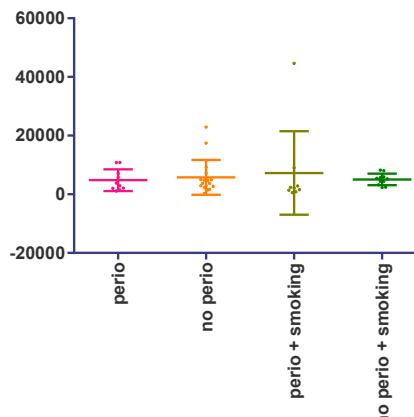**BPIFB3**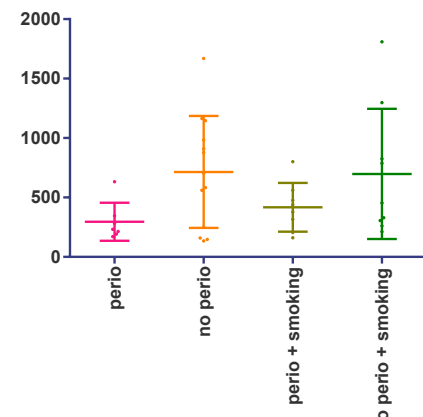**BPIFB4**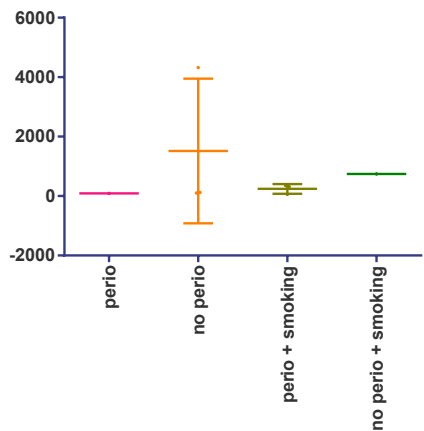**CGRP-1**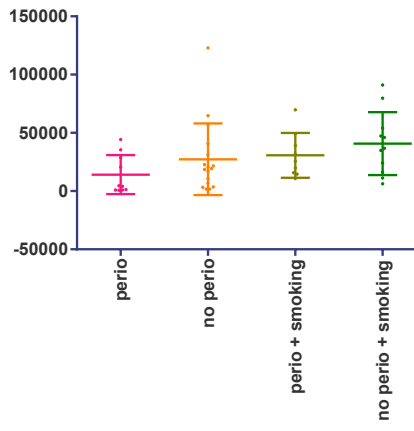**Cathelicidin**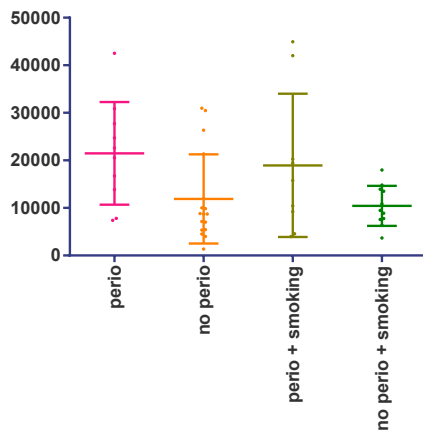

**CCL28**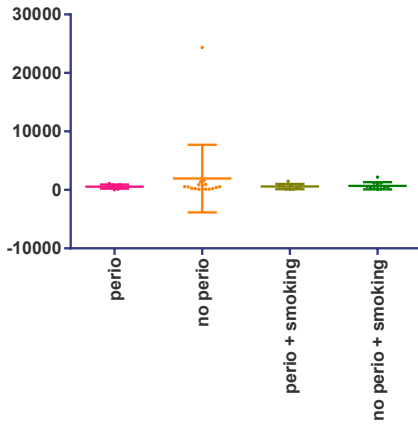**Cystatin SN**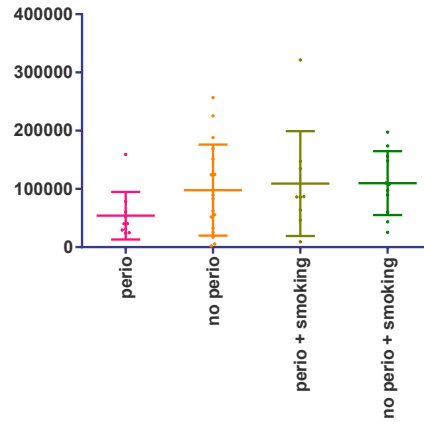**Cystatin A**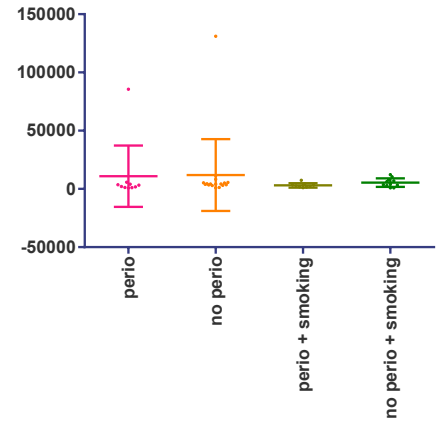**Cystatin B**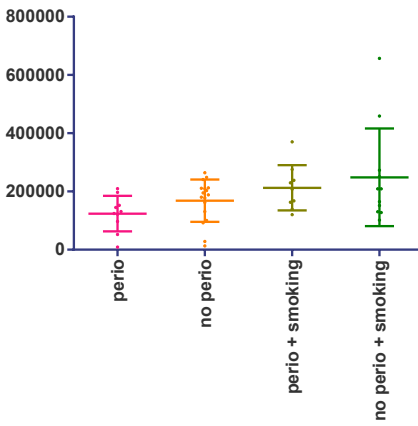**Cystatin C**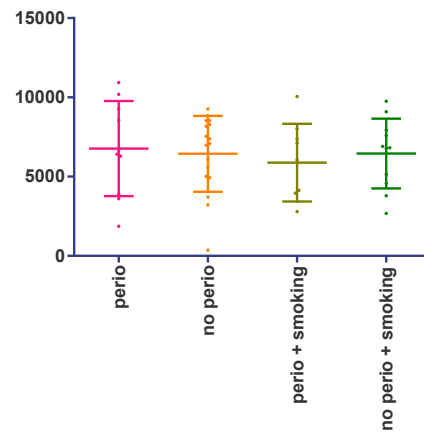**Cystatin D**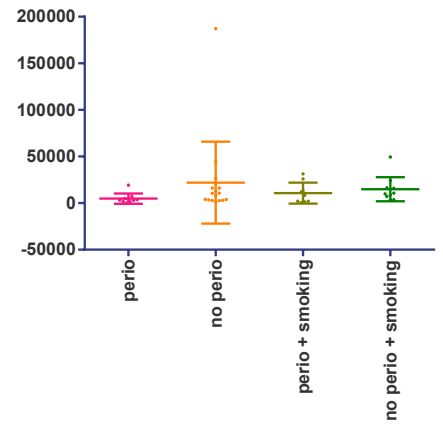**Cystatin S**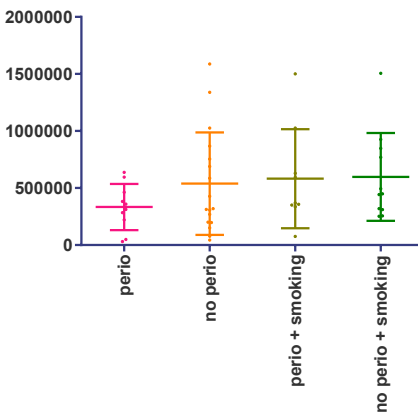**Cystatin SA**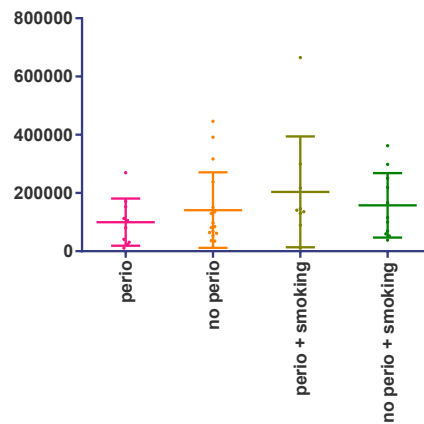**DMBT1**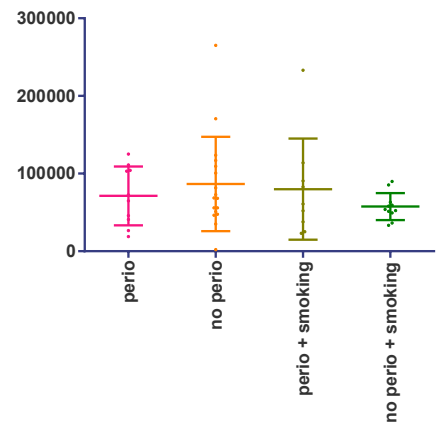

**Dermcidin**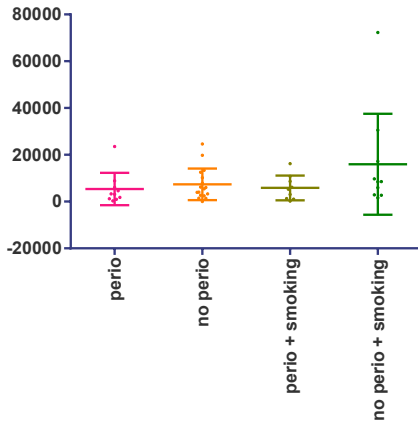**ECP**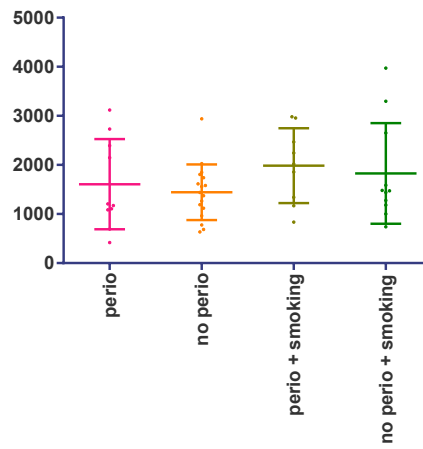**EPX**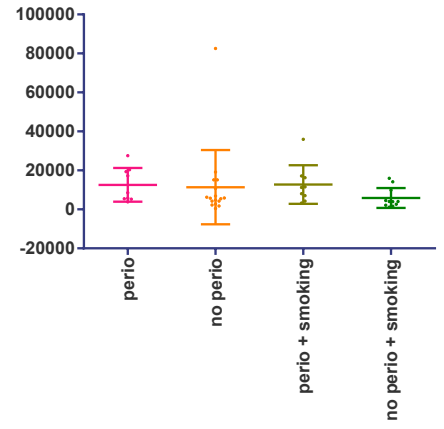**FGF2**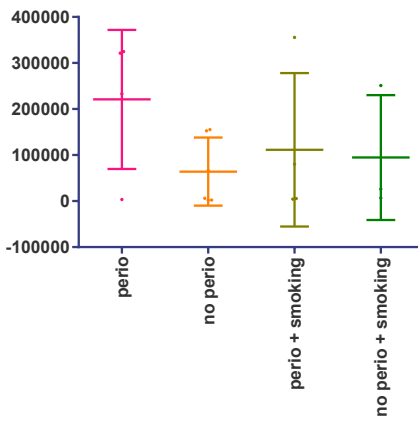**Fibronectin**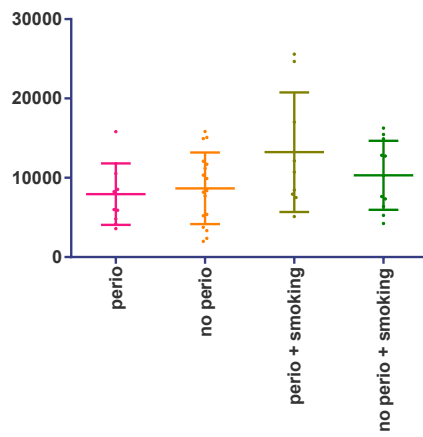**Lectin**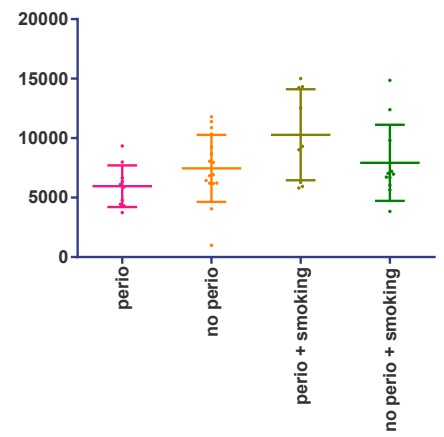**Hepcidin**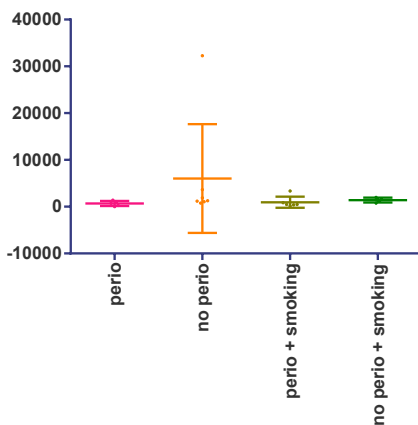**Histone H2A type 2-A**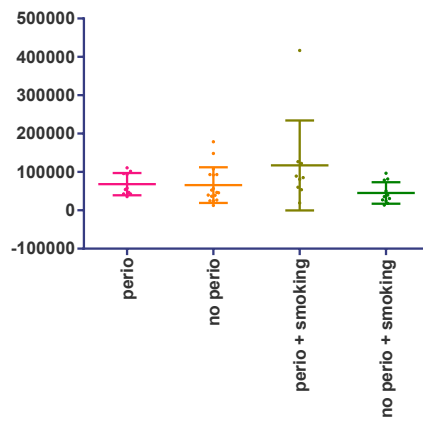**Histone H2B type 2-E**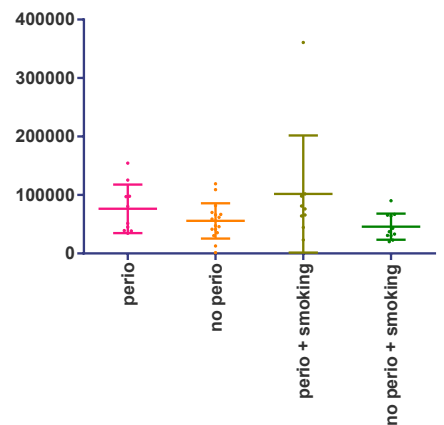

**Histone H2B type F-S**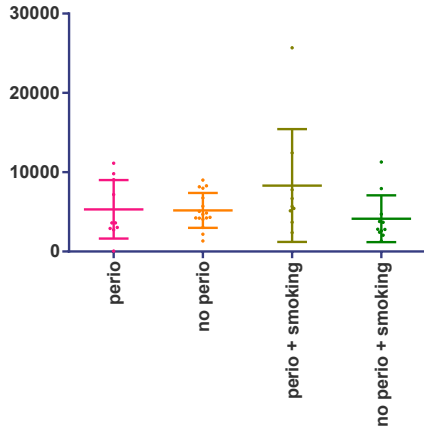**Lactoperoxidase**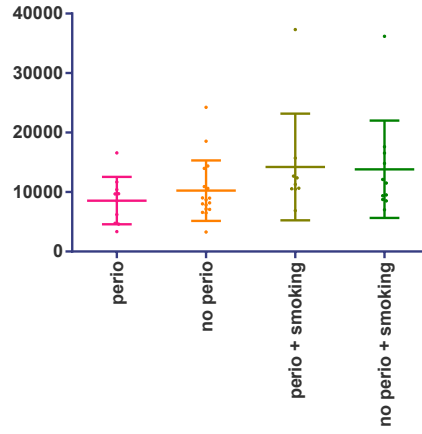**Lactotransferrin**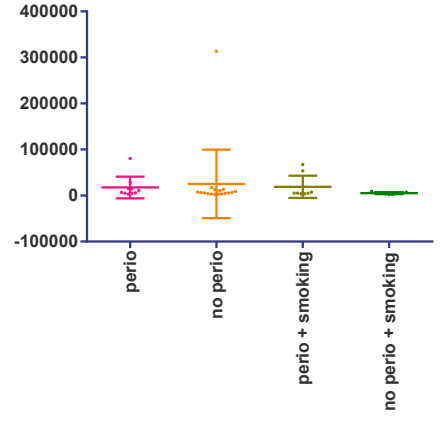**Lipocalin-1**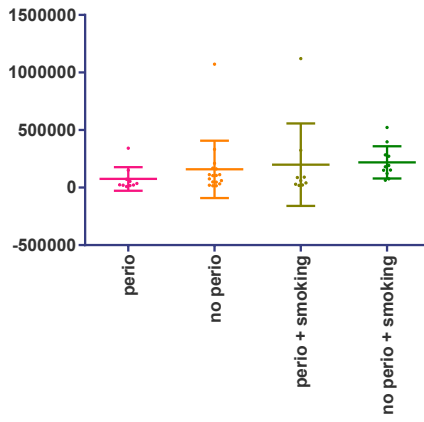**Lysozyme C**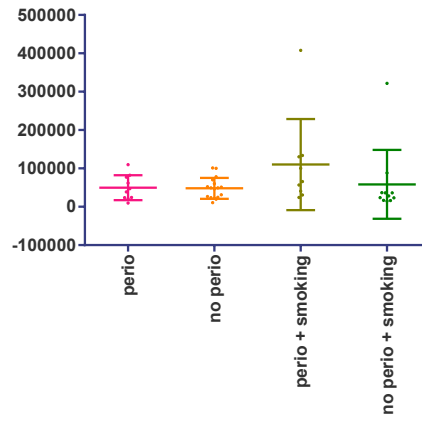**Mucin 7**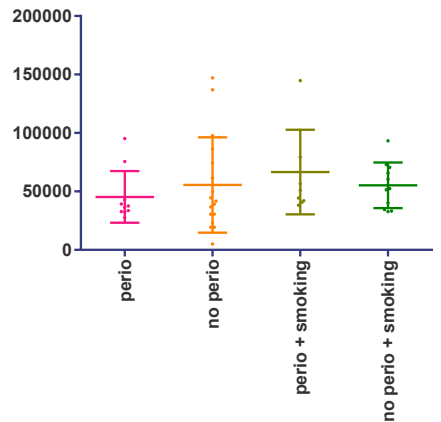**Myeloperoxidase**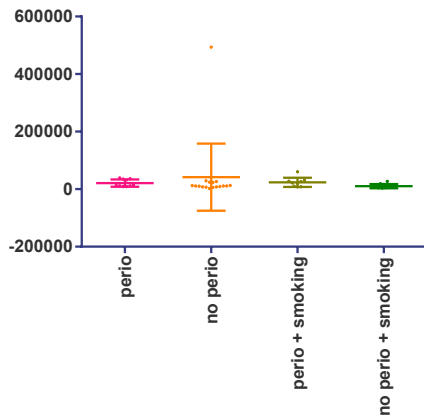**Neutrophil defensin 1**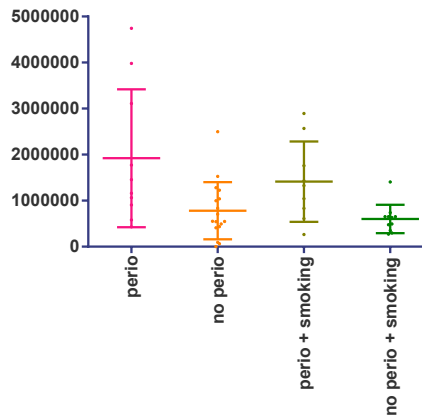**PGLYRP1**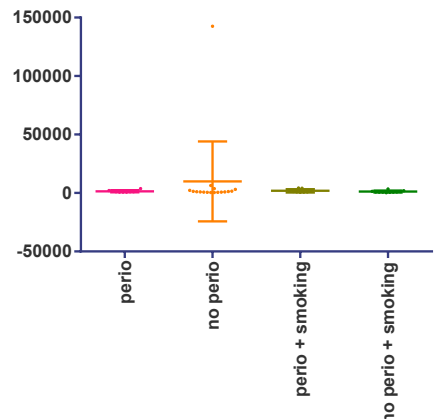

**PGLYRP3**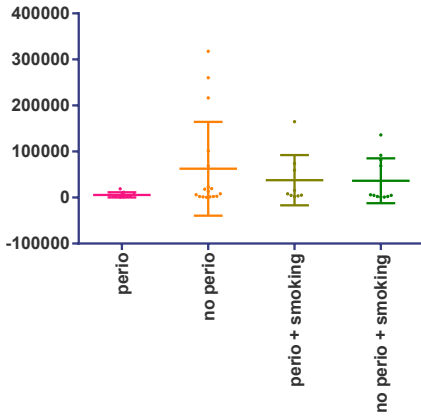**PGLYRP4**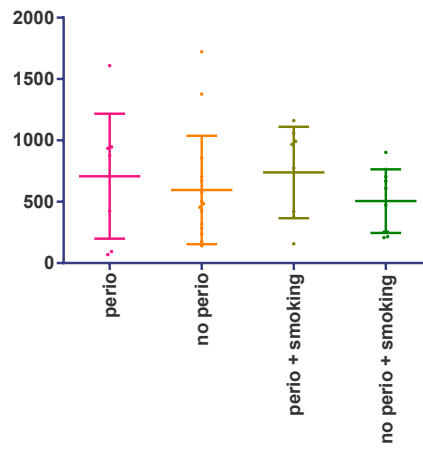**Perforin-1**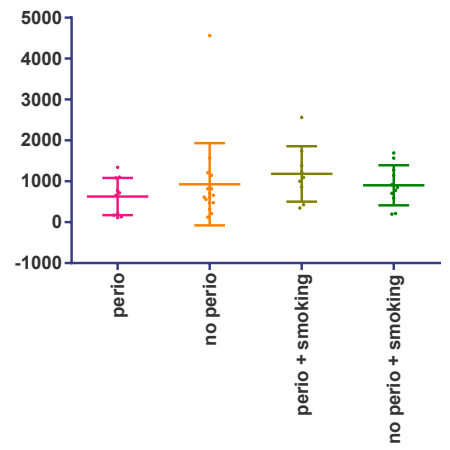**Platelet basic protein**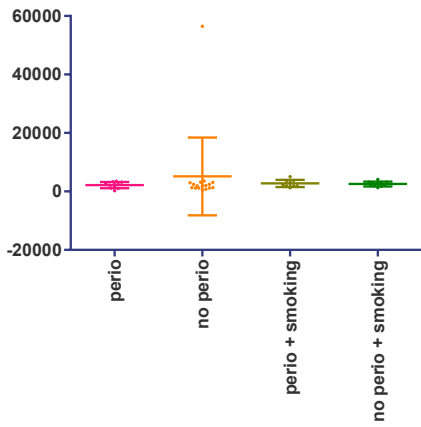**PIP**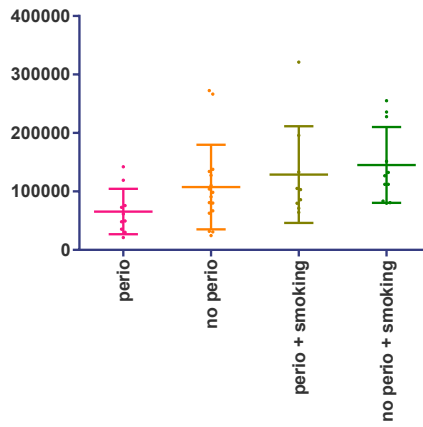**Neuropeptide Y**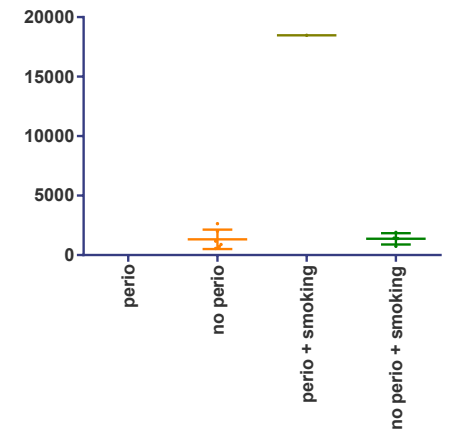**Protachykinin-1**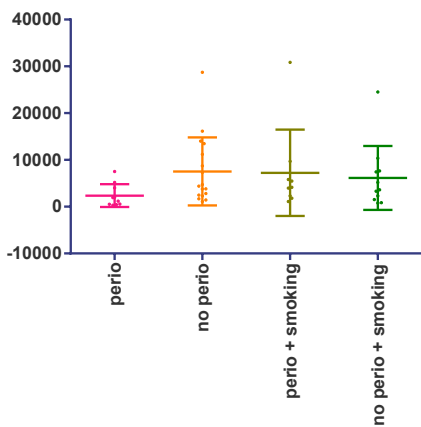**Protein S100-A7**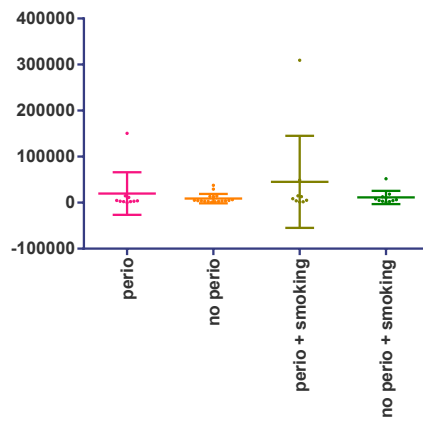**Protein S100-A8**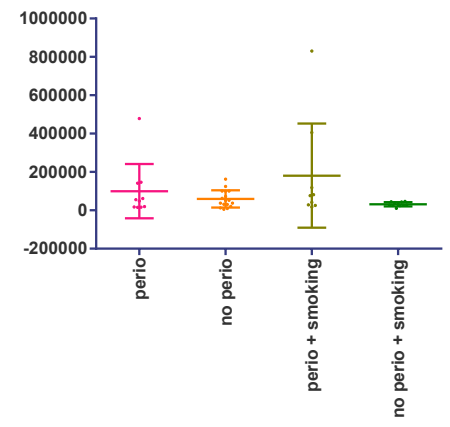

**Protein S100-A9**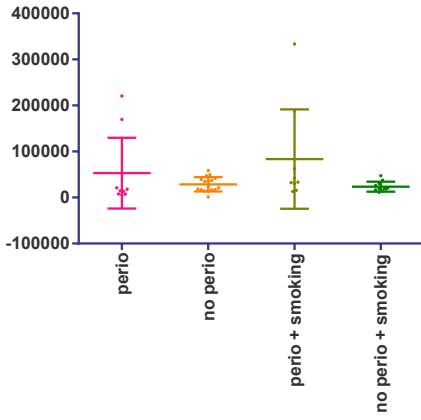**PADI2**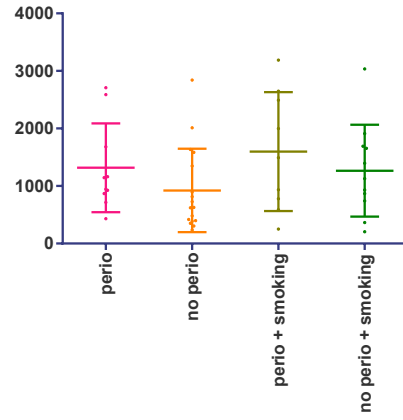**PADI4**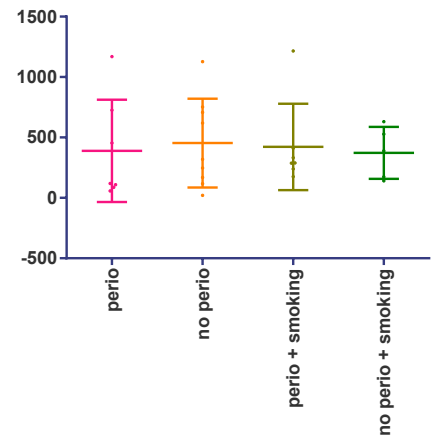**SFTPA1**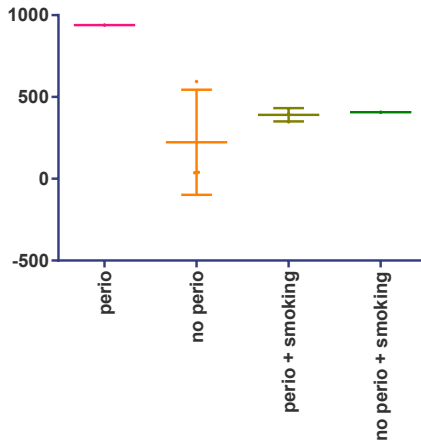**Ribonuclease 7**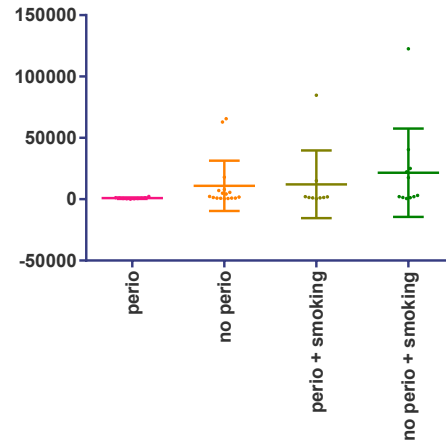**Serotransferrin**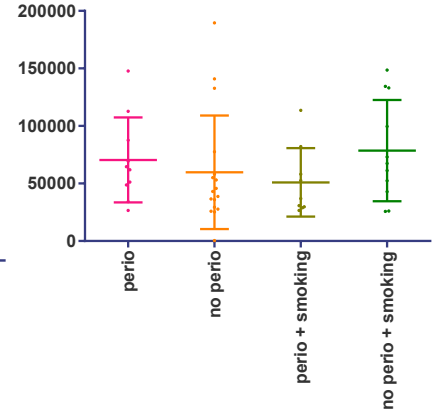**SPAG4**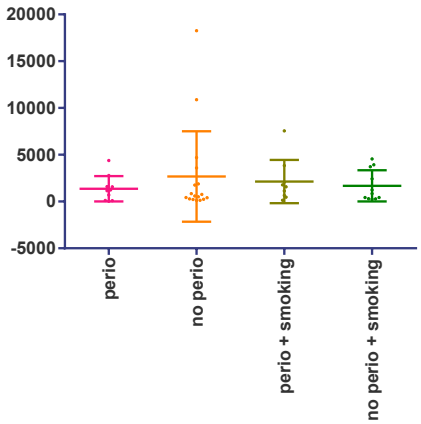**VIP peptides**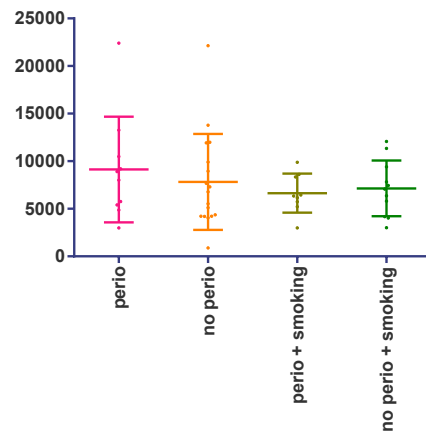**WFD12**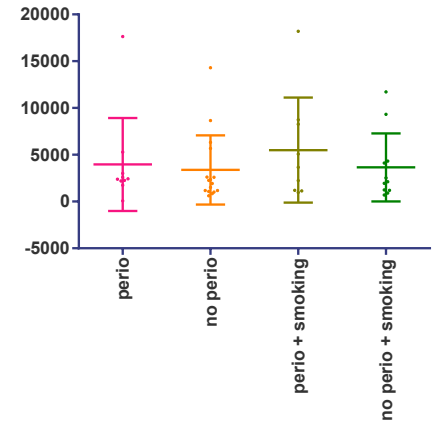

Supplement: jin-0011-0432-s02.pdf [file jin-0011-0432-s02.pdf]
